# Supplementary material
Source: PubMed Central journal article supplement (PMC1639519)
Supplement: rspb20063675s09.pdf [file rspb20063675s09.pdf]

| <b>Dependent variable</b> | <b>Predictors</b>                           | <b><math>\beta</math></b> | <b>p</b>     |
|---------------------------|---------------------------------------------|---------------------------|--------------|
| Brightness                | Carotenoid concentration                    | -0.194                    | 0.198        |
|                           | Brightness of white feathers                | 0.002                     | 0.987        |
| UV chroma                 | Carotenoid concentration                    | 0.024                     | 0.872        |
|                           | UV chroma of white feathers                 | 0.243                     | 0.105        |
| Violet-blue chroma        | <b>Carotenoid concentration</b>             | <b>-0.546</b>             | <b>0.000</b> |
|                           | <b>Violet-blue chroma of white feathers</b> | <b>0.342</b>              | <b>0.004</b> |
| Yellow chroma             | <b>Carotenoid concentration</b>             | <b>0.385</b>              | <b>0.006</b> |
|                           | <b>Yellow chroma of white feathers</b>      | <b>0.274</b>              | <b>0.047</b> |
| Hue                       | <b>Carotenoid concentration</b>             | <b>0.618</b>              | <b>0.000</b> |
| PC1                       | <b>Carotenoid concentration</b>             | <b>0.376</b>              | <b>0.008</b> |

**Table 2:** Backward linear regression models predicting color variables measured from intact yellow American goldfinch (*Carduelis tristis*) feathers using the same variables measured from the same feathers following total carotenoid removal and total concentration of carotenoids. Predictors that significantly contribute to the model are highlighted in bold.

| Source               | Dependent Variable              | Mean Square      | F             | Sig.         |
|----------------------|---------------------------------|------------------|---------------|--------------|
| Carotenoid treatment | <b>Carotenoid concentration</b> | <b>536063.11</b> | <b>19.279</b> | <b>0.000</b> |
|                      | <b>PC1</b>                      | <b>26.072</b>    | <b>19.767</b> | <b>0.000</b> |
|                      | <b>Yellow chroma</b>            | <b>&lt;0.001</b> | <b>16.300</b> | <b>0.000</b> |
|                      | <b>Blue chroma</b>              | <b>0.024</b>     | <b>40.338</b> | <b>0.000</b> |
|                      | <b>Hue</b>                      | <b>88.822</b>    | <b>55.044</b> | <b>0.000</b> |
|                      | Brightness                      | 135.537          | 1.503         | 0.227        |
|                      | UV chroma                       | <0.001           | 0.024         | 0.879        |
| Food treatment       | Carotenoid concentration        | 35754.554        | 1.265         | 0.267        |
|                      | PC1                             | 0.579            | 0.402         | 0.529        |
|                      | Yellow chroma                   | <0.001           | 2.789         | 0.102        |
|                      | Blue chroma                     | 0.001            | 1.857         | 0.180        |
|                      | Hue                             | 0.555            | 0.344         | 0.561        |
|                      | Brightness                      | 12.889           | 0.143         | 0.707        |
|                      | UV chroma                       | <0.001           | 1.663         | 0.204        |
| Carotenoid * Food    | Carotenoid concentration        | 50120.487        | 1.774         | 0.190        |
|                      | <b>PC1</b>                      | <b>6.860</b>     | <b>5.201</b>  | <b>0.028</b> |
|                      | Yellow chroma                   | <0.001           | 0.972         | 0.330        |
|                      | Blue chroma                     | <0.001           | 0.082         | 0.776        |
|                      | Hue                             | 0.331            | 0.205         | 0.653        |
|                      | Brightness                      | 335.936          | 3.725         | 0.060        |
|                      | <b>UV chroma</b>                | <b>0.003</b>     | <b>5.736</b>  | <b>0.021</b> |

**Table 3:** Fixed-factorial MANOVA describing the effects of experimental carotenoid and diet manipulation on expression of yellow plumage colour in American Goldfinches *Carduelis tristis*. Variables that were significantly affected by treatment are highlighted in bold.

| Source               | Dependent Variable   | Mean Square      | F            | Sig.         |
|----------------------|----------------------|------------------|--------------|--------------|
| Carotenoid treatment | PC1                  | 1.265            | 0.701        | 0.407        |
|                      | Yellow chroma        | <0.001           | 0.475        | 0.495        |
|                      | Blue chroma          | <0.001           | 3.078        | 0.86         |
|                      | Hue                  | 1738.462         | 0.823        | 0.369        |
|                      | Brightness           | 74.654           | 1.320        | 0.257        |
|                      | UV chroma            | 0.001            | 1.625        | 0.209        |
| Food treatment       | PC1                  | 4.718            | 2.613        | 0.113        |
|                      | Yellow chroma        | <0.001           | 2.408        | 0.128        |
|                      | <i>Blue chroma</i>   | <i>&lt;0.001</i> | <i>3.573</i> | <i>0.065</i> |
|                      | Hue                  | 4735.701         | 2.243        | 0.141        |
|                      | Brightness           | 40.749           | 0.721        | 0.401        |
|                      | UV chroma            | <0.001           | 0.480        | 0.492        |
| Carotenoid * Food    | <i>PC1</i>           | <i>7.102</i>     | <i>3.934</i> | <i>0.064</i> |
|                      | <i>Yellow chroma</i> | <i>&lt;0.001</i> | <i>3.534</i> | <i>0.067</i> |
|                      | <i>Blue chroma</i>   | <i>&lt;0.001</i> | <i>4.066</i> | <i>0.057</i> |
|                      | Hue                  | 1.877            | 0.001        | 0.976        |
|                      | Brightness           | 0.641            | 0.011        | 0.916        |
|                      | UV chroma            | 0.002            | 2.100        | 0.154        |

**Table 4:** Fixed-factorial MANOVA describing the effects of experimental carotenoid and diet manipulation on expression of white structural plumage coloration from de-pigmented yellow feathers of American Goldfinches *Carduelis tristis*. Variables that approached being significantly affected by treatment are highlighted in italics.
